# Supplementary material for: The Association of Chronic Periodontitis as a Potential Risk Factor with Rheumatoid Arthritis: A Nested Case-Control Study Using a Korean National Health Screening Cohort
Source: MDPI journal article supplement (doi:10.3390/biomedicines12050936), 2024-04-23
Supplement: s1 [file s1]

|                                         |                   |                   |                  |       |                  |        |                  |        |
|-----------------------------------------|-------------------|-------------------|------------------|-------|------------------|--------|------------------|--------|
| No CP                                   | 906/1187 (76.3%)  | 3901/5118 (76.2%) | 1                |       | 1                |        | 1                |        |
| CP ≥ 1                                  | 281/1187 (23.7%)  | 1217/5118 (23.8%) | 0.99 (0.86–1.15) | 0.939 | 0.99 (0.85–1.15) | 0.921  | 1.01 (0.87–1.18) | 0.870  |
| Total cholesterol < 200mg/dL (n = 9209) |                   |                   |                  |       |                  |        |                  |        |
| No CP                                   | 1479/1907 (77.6%) | 5717/7302 (78.3%) | 1                |       | 1                |        | 1                |        |
| CP ≥ 1                                  | 428/1907 (22.4%)  | 1585/7302 (21.7%) | 1.04 (0.93–1.18) | 0.485 | 1.05 (0.93–1.18) | 0.454  | 1.06 (0.94–1.20) | 0.369  |
| Total cholesterol ≥ 200mg/dL (n = 8631) |                   |                   |                  |       |                  |        |                  |        |
| No CP                                   | 1291/1661 (77.7%) | 5502/6970 (78.9%) | 1                |       | 1                |        | 1                |        |
| CP ≥ 1                                  | 370/1661 (22.3%)  | 1468/6970 (21.1%) | 1.07 (0.94–1.22) | 0.278 | 1.08 (0.94–1.22) | 0.273  | 1.10 (0.96–1.25) | 0.156  |
| CCI scores = 0 (n = 11,036)             |                   |                   |                  |       |                  |        |                  |        |
| No CP                                   | 1525/1991 (76.6%) | 7105/9045 (78.6%) | 1                |       | 1                |        | 1                |        |
| CP ≥ 1                                  | 466/1991 (23.4%)  | 1940/9045 (21.5%) | 1.12 (1.00–1.26) | 0.056 | 1.13 (1.00–1.27) | 0.043* | 1.13 (1.01–1.27) | 0.038* |
| CCI score = 1 (n = 3038)                |                   |                   |                  |       |                  |        |                  |        |
| No CP                                   | 588/740 (79.5%)   | 1782/2298 (77.6%) | 1                |       | 1                |        | 1                |        |
| CP ≥ 1                                  | 152/740 (20.5%)   | 516/2298 (22.5%)  | 0.89 (0.73–1.09) | 0.275 | 0.90 (0.74–1.11) | 0.328  | 0.91 (0.74–1.11) | 0.345  |
| CCI score ≥ 2 (n = 3766)                |                   |                   |                  |       |                  |        |                  |        |
| No CP                                   | 657/837 (78.5%)   | 2332/2929 (79.6%) | 1                |       | 1                |        | 1                |        |
| CP ≥ 1                                  | 180/837 (21.5%)   | 597/2929 (20.4%)  | 1.07 (0.89–1.29) | 0.479 | 1.08 (0.90–1.31) | 0.399  | 1.10 (0.91–1.33) | 0.326  |

Abbreviations: CP, chronic periodontitis; RA, rheumatoid arthritis; SBP, systolic blood pressure; DBP, diastolic blood pressure; CCI, Charlson Comorbidity Index.

\* Conditional or unconditional logistic regression analysis, Significance at  $p < 0.05$

† Stratified model for age, sex, income, and region of residence.

‡ Model 1 was adjusted for smoking, alcohol consumption, obesity and CCI scores.

§ Model 2 was adjusted for model 1 plus total cholesterol, systolic blood pressure, diastolic blood pressure, and fasting blood glucose.

**Supplementary Table S2.** Subgroup analyses of crude and adjusted odds ratios of chronic periodontitis (CP) for rheumatoid arthritis (RA) when participants are diagnosed with CP  $\geq 2$  within 1 year before index date.

| N of RA<br>(exposure/total, %)                   |                   | N of Control<br>(exposure/total, %) | Odd ratios for RA (95% confidence interval) |          |                  |          |                  |          |  |
|--------------------------------------------------|-------------------|-------------------------------------|---------------------------------------------|----------|------------------|----------|------------------|----------|--|
|                                                  |                   |                                     | Crude†                                      | <i>p</i> | Model 1†‡        | <i>p</i> | Model 2†§        | <i>p</i> |  |
| Age < 65 years old (n = 8780)                    |                   |                                     |                                             |          |                  |          |                  |          |  |
| CP < 2                                           | 1604/1756 (91.3%) | 6423/7024 (91.4%)                   | 1                                           |          | 1                |          | 1                |          |  |
| CP ≥ 2                                           | 152/1756 (8.7%)   | 601/7024 (8.6%)                     | 1.01 (0.84–1.22)                            | 0.894    | 1.01 (0.84–1.22) | 0.896    | 1.01 (0.84–1.22) | 0.904    |  |
| Age ≥ 65 years old (n = 9060)                    |                   |                                     |                                             |          |                  |          |                  |          |  |
| CP < 2                                           | 1574/1812 (86.9%) | 6344/7248 (87.5%)                   | 1                                           |          | 1                |          | 1                |          |  |
| CP ≥ 2                                           | 238/1812 (13.1%)  | 904/7248 (12.5%)                    | 1.06 (0.91–1.24)                            | 0.448    | 1.06 (0.90–1.23) | 0.494    | 1.08 (0.92–1.26) | 0.340    |  |
| Men (n = 5275)                                   |                   |                                     |                                             |          |                  |          |                  |          |  |
| CP < 2                                           | 898/1055 (85.1%)  | 3649/4220 (86.5%)                   | 1                                           |          | 1                |          | 1                |          |  |
| CP ≥ 2                                           | 157/1055 (14.9%)  | 571/4220 (13.5%)                    | 1.12 (0.92–1.35)                            | 0.255    | 1.12 (0.93–1.36) | 0.244    | 1.14 (0.94–1.38) | 0.188    |  |
| Women (n = 12,565)                               |                   |                                     |                                             |          |                  |          |                  |          |  |
| CP < 2                                           | 2280/2513 (90.7%) | 9118/10,052 (90.7%)                 | 1                                           |          | 1                |          | 1                |          |  |
| CP ≥ 2                                           | 233/2513 (9.3%)   | 934/10,052 (9.3%)                   | 1.00 (0.86–1.16)                            | 0.976    | 0.99 (0.86–1.16) | 0.945    | 1.01 (0.86–1.17) | 0.942    |  |
| Low income (n = 8630)                            |                   |                                     |                                             |          |                  |          |                  |          |  |
| CP < 2                                           | 1554/1726 (90.0%) | 6256/6904 (90.6%)                   | 1                                           |          | 1                |          | 1                |          |  |
| CP ≥ 2                                           | 172/1726 (10.0%)  | 648/6904 (9.4%)                     | 1.07 (0.90–1.28)                            | 0.463    | 1.07 (0.89–1.28) | 0.469    | 1.07 (0.90–1.28) | 0.431    |  |
| High income (n = 9210)                           |                   |                                     |                                             |          |                  |          |                  |          |  |
| CP < 2                                           | 1624/1842 (88.2%) | 6511/7368 (88.4%)                   | 1                                           |          | 1                |          | 1                |          |  |
| CP ≥ 2                                           | 218/1842 (11.8%)  | 857/7368 (11.6%)                    | 1.02 (0.87–1.19)                            | 0.807    | 1.02 (0.87–1.19) | 0.829    | 1.04 (0.89–1.22) | 0.642    |  |
| Urban residents (n = 7705)                       |                   |                                     |                                             |          |                  |          |                  |          |  |
| CP < 2                                           | 1365/1541 (88.6%) | 5434/6164 (88.2%)                   | 1                                           |          | 1                |          | 1                |          |  |
| CP ≥ 2                                           | 176/1541 (11.4%)  | 730/6164 (11.8%)                    | 0.96 (0.81–1.14)                            | 0.649    | 0.96 (0.80–1.14) | 0.625    | 0.96 (0.80–1.15) | 0.648    |  |
| Rural residents (n = 10,135)                     |                   |                                     |                                             |          |                  |          |                  |          |  |
| CP < 2                                           | 1813/2027 (89.4%) | 7333/8108 (90.4%)                   | 1                                           |          | 1                |          | 1                |          |  |
| CP ≥ 2                                           | 214/2027 (10.6%)  | 775/8108 (9.6%)                     | 1.12 (0.95–1.31)                            | 0.175    | 1.12 (0.95–1.31) | 0.176    | 1.14 (0.97–1.34) | 0.107    |  |
| Underweight (n = 388)                            |                   |                                     |                                             |          |                  |          |                  |          |  |
| CP < 2                                           | 62/69 (89.9%)     | 288/319 (90.3%)                     | 1                                           |          | 1                |          | 1                |          |  |
| CP ≥ 2                                           | 7/69 (10.1%)      | 31/319 (9.7%)                       | 1.05 (0.44–2.49)                            | 0.914    | 0.88 (0.36–2.13) | 0.769    | 0.86 (0.35–2.13) | 0.741    |  |
| Normal weight (n = 6468)                         |                   |                                     |                                             |          |                  |          |                  |          |  |
| CP < 2                                           | 1179/1334 (88.4%) | 4610/5134 (89.8%)                   | 1                                           |          | 1                |          | 1                |          |  |
| CP ≥ 2                                           | 155/1334 (11.6%)  | 524/5134 (10.2%)                    | 1.16 (0.96–1.40)                            | 0.134    | 1.15 (0.95–1.40) | 0.144    | 1.17 (0.97–1.42) | 0.110    |  |
| Overweight (n = 4807)                            |                   |                                     |                                             |          |                  |          |                  |          |  |
| CP < 2                                           | 858/945 (90.8%)   | 3451/3862 (89.4%)                   | 1                                           |          | 1                |          | 1                |          |  |
| CP ≥ 2                                           | 87/945 (9.2%)     | 411/3862 (10.6%)                    | 0.85 (0.67–1.09)                            | 0.195    | 0.84 (0.66–1.07) | 0.166    | 0.85 (0.66–1.08) | 0.185    |  |
| Obese (n = 6177)                                 |                   |                                     |                                             |          |                  |          |                  |          |  |
| CP < 2                                           | 1079/1220 (88.4%) | 4418/4957 (89.1%)                   | 1                                           |          | 1                |          | 1                |          |  |
| CP ≥ 2                                           | 141/1220 (11.6%)  | 539/4957 (10.9%)                    | 1.07 (0.88–1.30)                            | 0.494    | 1.08 (0.88–1.31) | 0.473    | 1.09 (0.89–1.33) | 0.400    |  |
| Non-smoker (n = 14,404)                          |                   |                                     |                                             |          |                  |          |                  |          |  |
| CP < 2                                           | 2570/2853 (90.1%) | 10,418/11,551 (90.2%)               | 1                                           |          | 1                |          | 1                |          |  |
| CP ≥ 2                                           | 283/2853 (9.9%)   | 1133/11,551 (9.8%)                  | 1.01 (0.88–1.16)                            | 0.858    | 1.01 (0.88–1.16) | 0.858    | 1.03 (0.89–1.18) | 0.702    |  |
| Past smoker and current smoker (n = 3436)        |                   |                                     |                                             |          |                  |          |                  |          |  |
| CP < 2                                           | 608/715 (85.0%)   | 2349/2721 (86.3%)                   | 1                                           |          | 1                |          | 1                |          |  |
| CP ≥ 2                                           | 107/715 (15.0%)   | 372/2721 (13.7%)                    | 1.11 (0.88–1.40)                            | 0.374    | 1.12 (0.89–1.42) | 0.338    | 1.14 (0.90–1.45) | 0.273    |  |
| Alcohol consumption < 1 time a week (n = 13,182) |                   |                                     |                                             |          |                  |          |                  |          |  |
| CP < 2                                           | 2435/2690 (90.5%) | 9483/10,492 (90.4%)                 | 1                                           |          | 1                |          | 1                |          |  |
| CP ≥ 2                                           | 255/2690 (9.5%)   | 1009/10,492 (9.6%)                  | 0.98 (0.85–1.14)                            | 0.830    | 0.98 (0.84–1.13) | 0.752    | 0.99 (0.85–1.14) | 0.865    |  |
| Alcohol consumption ≥ 1 time a week (n = 4658)   |                   |                                     |                                             |          |                  |          |                  |          |  |
| CP < 2                                           | 743/878 (84.6%)   | 3284/3780 (86.9%)                   | 1                                           |          | 1                |          | 1                |          |  |
| CP ≥ 2                                           | 135/878 (15.4%)   | 496/3780 (13.1%)                    | 1.20 (0.98–1.48)                            | 0.079    | 1.20 (0.98–1.48) | 0.079    | 1.20 (0.98–1.48) | 0.081    |  |
| SBP < 140 mmHg and DBP < 90 mmHg (n = 13,526)    |                   |                                     |                                             |          |                  |          |                  |          |  |
| CP < 2                                           | 2472/2783 (88.8%) | 9583/10,743 (89.2%)                 | 1                                           |          | 1                |          | 1                |          |  |
| CP ≥ 2                                           | 311/2783 (11.2%)  | 1160/10,743 (10.8%)                 | 1.04 (0.91–1.19)                            | 0.565    | 1.03 (0.91–1.18) | 0.615    | 1.05 (0.92–1.20) | 0.467    |  |
| SBP ≥ 140 mmHg or DBP ≥ 90 mmHg (n = 4314)       |                   |                                     |                                             |          |                  |          |                  |          |  |
| CP < 2                                           | 706/785 (89.9%)   | 3184/3529 (90.2%)                   | 1                                           |          | 1                |          | 1                |          |  |
| CP ≥ 2                                           | 79/785 (10.1%)    | 345/3529 (9.8%)                     | 1.03 (0.80–1.34)                            | 0.805    | 1.04 (0.80–1.35) | 0.760    | 1.04 (0.80–1.36) | 0.747    |  |
| Fasting blood glucose < 100 mg/dL (n = 11,535)   |                   |                                     |                                             |          |                  |          |                  |          |  |
| CP < 2                                           | 2134/2381 (89.6%) | 8242/9154 (90.0%)                   | 1                                           |          | 1                |          | 1                |          |  |
| CP ≥ 2                                           | 247/2381 (10.4%)  | 912/9154 (10.0%)                    | 1.05 (0.90–1.21)                            | 0.548    | 1.04 (0.89–1.21) | 0.627    | 1.05 (0.90–1.22) | 0.548    |  |
| Fasting blood glucose ≥ 100 mg/dL (n = 6305)     |                   |                                     |                                             |          |                  |          |                  |          |  |

|                                         |                   |                   |                  |       |                  |       |                  |       |
|-----------------------------------------|-------------------|-------------------|------------------|-------|------------------|-------|------------------|-------|
| CP < 2                                  | 1044/1187 (88.0%) | 4525/5118 (88.4%) | 1                |       | 1                |       | 1                |       |
| CP ≥ 2                                  | 143/1187 (12.1%)  | 593/5118 (11.6%)  | 1.05 (0.86–1.27) | 0.653 | 1.04 (0.86–1.27) | 0.673 | 1.07 (0.87–1.30) | 0.528 |
| Total cholesterol < 200mg/dL (n = 9209) |                   |                   |                  |       |                  |       |                  |       |
| CP < 2                                  | 1691/1907 (88.7%) | 6524/7302 (89.4%) | 1                |       | 1                |       | 1                |       |
| CP ≥ 2                                  | 216/1907 (11.3%)  | 778/7302 (10.7%)  | 1.07 (0.91–1.26) | 0.400 | 1.07 (0.91–1.26) | 0.390 | 1.08 (0.92–1.27) | 0.353 |
| Total cholesterol ≥ 200mg/dL (n = 8631) |                   |                   |                  |       |                  |       |                  |       |
| CP < 2                                  | 1487/1661 (89.5%) | 6243/6970 (89.6%) | 1                |       | 1                |       | 1                |       |
| CP ≥ 2                                  | 174/1661 (10.5%)  | 727/6970 (10.4%)  | 1.00 (0.84–1.20) | 0.957 | 1.00 (0.84–1.20) | 0.968 | 1.03 (0.86–1.22) | 0.774 |
| CCI score = 0 (n = 11,036)              |                   |                   |                  |       |                  |       |                  |       |
| CP < 2                                  | 1757/1991 (88.3%) | 8089/9045 (89.4%) | 1                |       | 1                |       | 1                |       |
| CP ≥ 2                                  | 234/1991 (11.8%)  | 956/9045 (10.6%)  | 1.13 (0.97–1.31) | 0.123 | 1.14 (0.97–1.32) | 0.103 | 1.14 (0.97–1.32) | 0.106 |
| CCI score = 1 (n = 3038)                |                   |                   |                  |       |                  |       |                  |       |
| CP < 2                                  | 669/740 (90.4%)   | 2047/2298 (89.1%) | 1                |       | 1                |       | 1                |       |
| CP ≥ 2                                  | 71/740 (9.6%)     | 251/2298 (10.9%)  | 0.87 (0.66–1.14) | 0.308 | 0.87 (0.66–1.15) | 0.336 | 0.87 (0.66–1.15) | 0.336 |
| CCI score ≥ 2 (n = 3766)                |                   |                   |                  |       |                  |       |                  |       |
| CP < 2                                  | 752/837 (89.8%)   | 2631/2929 (89.8%) | 1                |       | 1                |       | 1                |       |
| CP ≥ 2                                  | 85/837 (10.2%)    | 298/2929 (10.2%)  | 1.00 (0.77–1.29) | 0.987 | 1.00 (0.77–1.29) | 0.997 | 1.00 (0.77–1.29) | 0.987 |

Abbreviations: CP, chronic periodontitis; RA, rheumatoid arthritis; SBP, systolic blood pressure; DBP, diastolic blood pressure; CCI, Charlson Comorbidity Index.

\* Conditional or unconditional logistic regression analysis, Significance at  $p < 0.05$

† Stratified model for age, sex, income, and region of residence.

‡ Model 1 was adjusted for smoking, alcohol consumption, obesity and CCI scores.

§ Model 2 was adjusted for model 1 plus total cholesterol, systolic blood pressure, diastolic blood pressure, and fasting blood glucose.

**Supplementary Table S3.** Subgroup analyses of crude and adjusted odds ratios of chronic periodontitis (CP) for rheumatoid arthritis (RA) when participants are diagnosed with CP  $\geq 3$  within 1 year before index date.

| N of RA<br>(exposure/total, %)                   |                   | N of Control<br>(exposure/total, %) | Odd ratios for RA (95% confidence interval) |       |                  |       |                  |       |
|--------------------------------------------------|-------------------|-------------------------------------|---------------------------------------------|-------|------------------|-------|------------------|-------|
|                                                  |                   |                                     | Crude†                                      | p     | Model 1†‡        | p     | Model 2†§        | p     |
| Age < 65 years old (n = 8780)                    |                   |                                     |                                             |       |                  |       |                  |       |
| CP < 3                                           | 1675/1756 (95.4%) | 6669/7024 (95.0%)                   | 1                                           |       | 1                |       | 1                |       |
| CP ≥ 3                                           | 81/1756 (4.6%)    | 355/7024 (5.1%)                     | 0.91 (0.71–1.16)                            | 0.447 | 0.91 (0.71–1.17) | 0.458 | 0.91 (0.71–1.17) | 0.455 |
| Age ≥ 65 years old (n = 9060)                    |                   |                                     |                                             |       |                  |       |                  |       |
| CP < 3                                           | 1673/1812 (92.3%) | 6732/7248 (92.9%)                   | 1                                           |       | 1                |       | 1                |       |
| CP ≥ 3                                           | 139/1812 (7.7%)   | 516/7248 (7.1%)                     | 1.08 (0.89–1.32)                            | 0.417 | 1.08 (0.88–1.31) | 0.468 | 1.10 (0.91–1.34) | 0.331 |
| Men (n = 5275)                                   |                   |                                     |                                             |       |                  |       |                  |       |
| CP < 3                                           | 963/1055 (91.3%)  | 3885/4220 (92.1%)                   | 1                                           |       | 1                |       | 1                |       |
| CP ≥ 3                                           | 92/1055 (8.7%)    | 335/4220 (7.9%)                     | 1.11 (0.87–1.41)                            | 0.405 | 1.12 (0.88–1.42) | 0.370 | 1.14 (0.89–1.45) | 0.299 |
| Women (n = 12,565)                               |                   |                                     |                                             |       |                  |       |                  |       |
| CP < 3                                           | 2385/2513 (94.9%) | 9516/10,052 (94.7%)                 | 1                                           |       | 1                |       | 1                |       |
| CP ≥ 3                                           | 128/2513 (5.1%)   | 536/10,052 (5.3%)                   | 0.95 (0.78–1.16)                            | 0.637 | 0.95 (0.78–1.16) | 0.618 | 0.96 (0.79–1.17) | 0.709 |
| Low income (n = ,630)                            |                   |                                     |                                             |       |                  |       |                  |       |
| CP < 3                                           | 1630/1726 (94.4%) | 6529/6904 (94.6%)                   | 1                                           |       | 1                |       | 1                |       |
| CP ≥ 3                                           | 96/1726 (5.6%)    | 375/6904 (5.4%)                     | 1.03 (0.81–1.29)                            | 0.830 | 1.03 (0.81–1.29) | 0.834 | 1.04 (0.82–1.31) | 0.760 |
| High income (n = 9210)                           |                   |                                     |                                             |       |                  |       |                  |       |
| CP < 3                                           | 1718/1842 (93.3%) | 6872/7368 (93.3%)                   | 1                                           |       | 1                |       | 1                |       |
| CP ≥ 3                                           | 124/1842 (6.7%)   | 496/7368 (6.7%)                     | 1.00 (0.82–1.23)                            | 1.000 | 1.00 (0.81–1.22) | 0.981 | 1.02 (0.83–1.25) | 0.839 |
| Urban residents (n = 7705)                       |                   |                                     |                                             |       |                  |       |                  |       |
| CP < 3                                           | 1434/1541 (93.1%) | 5,737/6164 (93.1%)                  | 1                                           |       | 1                |       | 1                |       |
| CP ≥ 3                                           | 107/1541 (6.9%)   | 427/6164 (6.9%)                     | 1.00 (0.80–1.25)                            | 0.982 | 1.00 (0.80–1.25) | 0.992 | 1.00 (0.80–1.25) | 0.996 |
| Rural residents (n = 10,135)                     |                   |                                     |                                             |       |                  |       |                  |       |
| CP < 3                                           | 1914/2027 (94.4%) | 7,664/8108 (94.5%)                  | 1                                           |       | 1                |       | 1                |       |
| CP ≥ 3                                           | 113/2027 (5.6%)   | 444/8108 (5.5%)                     | 1.02 (0.82–1.26)                            | 0.861 | 1.02 (0.82–1.26) | 0.849 | 1.05 (0.85–1.30) | 0.651 |
| Underweight (n = 388)                            |                   |                                     |                                             |       |                  |       |                  |       |
| CP < 3                                           | 64/69 (92.8%)     | 305/319 (95.6%)                     | 1                                           |       | 1                |       | 1                |       |
| CP ≥ 3                                           | 5/69 (7.3%)       | 14/319 (4.4%)                       | 1.70 (0.59–4.89)                            | 0.324 | 1.55 (0.52–4.58) | 0.432 | 1.58 (0.53–4.73) | 0.416 |
| Normal weight (n = 6468)                         |                   |                                     |                                             |       |                  |       |                  |       |
| CP < 3                                           | 1247/1334 (93.5%) | 4,840/5134 (94.3%)                  | 1                                           |       | 1                |       | 1                |       |
| CP ≥ 3                                           | 87/1334 (6.5%)    | 294/5134 (5.7%)                     | 1.15 (0.90–1.47)                            | 0.272 | 1.14 (0.89–1.46) | 0.303 | 1.16 (0.91–1.49) | 0.239 |
| Overweight (n = 4807)                            |                   |                                     |                                             |       |                  |       |                  |       |
| CP < 3                                           | 898/945 (95.0%)   | 3606/3862 (93.4%)                   | 1                                           |       | 1                |       | 1                |       |
| CP ≥ 3                                           | 47/945 (5.0%)     | 256/3862 (6.6%)                     | 0.74 (0.54–1.01)                            | 0.062 | 0.73 (0.53–1.01) | 0.057 | 0.74 (0.54–1.02) | 0.066 |
| Obese (n = 6177)                                 |                   |                                     |                                             |       |                  |       |                  |       |
| CP < 3                                           | 1139/1220 (93.4%) | 4650/4957 (93.8%)                   | 1                                           |       | 1                |       | 1                |       |
| CP ≥ 3                                           | 81/1220 (6.6%)    | 307/4957 (6.2%)                     | 1.08 (0.84–1.39)                            | 0.565 | 1.09 (0.85–1.41) | 0.504 | 1.10 (0.85–1.43) | 0.450 |
| Non-smoker (n = 14,404)                          |                   |                                     |                                             |       |                  |       |                  |       |
| CP < 3                                           | 2693/2853 (94.4%) | 10,904/11,551 (94.4%)               | 1                                           |       | 1                |       | 1                |       |
| CP ≥ 3                                           | 160/2853 (5.6%)   | 647/11,551 (5.6%)                   | 1.00 (0.84–1.20)                            | 0.989 | 1.00 (0.84–1.20) | 0.999 | 1.02 (0.85–1.22) | 0.854 |
| Past smoker and current smoker (n = 3436)        |                   |                                     |                                             |       |                  |       |                  |       |
| CP < 3                                           | 655/715 (91.6%)   | 2497/2721 (91.8%)                   | 1                                           |       | 1                |       | 1                |       |
| CP ≥ 3                                           | 60/715 (8.4%)     | 224/2721 (8.2%)                     | 1.02 (0.76–1.38)                            | 0.890 | 1.04 (0.77–1.40) | 0.819 | 1.06 (0.78–1.43) | 0.724 |
| Alcohol consumption < 1 time a week (n = 13,182) |                   |                                     |                                             |       |                  |       |                  |       |
| CP < 3                                           | 2548/2690 (94.7%) | 9926/10,492 (94.6%)                 | 1                                           |       | 1                |       | 1                |       |
| CP ≥ 3                                           | 142/2690 (5.3%)   | 566/10,492 (5.4%)                   | 0.98 (0.81–1.18)                            | 0.813 | 0.97 (0.80–1.17) | 0.747 | 0.98 (0.81–1.19) | 0.864 |
| Alcohol consumption ≥ 1 time a week (n = 4658)   |                   |                                     |                                             |       |                  |       |                  |       |
| CP < 3                                           | 800/878 (91.1%)   | 3475/3780 (91.9%)                   | 1                                           |       | 1                |       | 1                |       |
| CP ≥ 3                                           | 78/878 (8.9%)     | 305/3780 (8.1%)                     | 1.11 (0.86–1.44)                            | 0.429 | 1.11 (0.86–1.45) | 0.419 | 1.11 (0.86–1.45) | 0.426 |
| SBP < 140 mmHg and DBP < 90 mmHg (n = 13,526)    |                   |                                     |                                             |       |                  |       |                  |       |
| CP < 3                                           | 2603/2783 (93.5%) | 10,068/10,743 (93.7%)               | 1                                           |       | 1                |       | 1                |       |
| CP ≥ 3                                           | 180/2783 (6.5%)   | 675/10,743 (6.3%)                   | 1.03 (0.87–1.22)                            | 0.719 | 1.03 (0.87–1.22) | 0.744 | 1.05 (0.88–1.24) | 0.592 |
| SBP ≥ 140 mmHg or DBP ≥ 90 mmHg (n = 4314)       |                   |                                     |                                             |       |                  |       |                  |       |
| CP < 3                                           | 745/785 (94.9%)   | 3333/3529 (94.5%)                   | 1                                           |       | 1                |       | 1                |       |
| CP ≥ 3                                           | 40/785 (5.1%)     | 196/3529 (5.6%)                     | 0.91 (0.64–1.29)                            | 0.610 | 0.92 (0.65–1.30) | 0.624 | 0.92 (0.64–1.30) | 0.626 |
| Fasting blood glucose < 100 mg/dL (n = 11,535)   |                   |                                     |                                             |       |                  |       |                  |       |
| CP < 3                                           | 2240/2381 (94.1%) | 8636/9154 (94.3%)                   | 1                                           |       | 1                |       | 1                |       |
| CP ≥ 3                                           | 141/2381 (5.9%)   | 518/9154 (5.7%)                     | 1.05 (0.87–1.27)                            | 0.618 | 1.04 (0.86–1.26) | 0.678 | 1.05 (0.87–1.28) | 0.593 |
| Fasting blood glucose ≥ 100 mg/dL (n = 6305)     |                   |                                     |                                             |       |                  |       |                  |       |

|                                         |                   |                   |                  |       |                  |       |                  |       |  |
|-----------------------------------------|-------------------|-------------------|------------------|-------|------------------|-------|------------------|-------|--|
| CP < 3                                  | 1108/1187 (93.3%) | 4765/5118 (93.1%) | 1                |       | 1                |       | 1                |       |  |
| CP ≥ 3                                  | 79/1187 (6.7%)    | 353/5118 (6.9%)   | 0.96 (0.75–1.24) | 0.769 | 0.96 (0.75–1.24) | 0.757 | 0.99 (0.76–1.27) | 0.908 |  |
| Total cholesterol < 200mg/dL (n = 9209) |                   |                   |                  |       |                  |       |                  |       |  |
| CP < 3                                  | 1778/1907 (93.2%) | 6856/7302 (93.9%) | 1                |       | 1                |       | 1                |       |  |
| CP ≥ 3                                  | 129/1907 (6.8%)   | 446/7302 (6.1%)   | 1.12 (0.91–1.37) | 0.292 | 1.12 (0.91–1.37) | 0.274 | 1.13 (0.92–1.38) | 0.246 |  |
| Total cholesterol ≥ 200mg/dL (n = 8631) |                   |                   |                  |       |                  |       |                  |       |  |
| CP < 3                                  | 1570/1661 (94.5%) | 6545/6970 (93.9%) | 1                |       | 1                |       | 1                |       |  |
| CP ≥ 3                                  | 91/1661 (5.5%)    | 425/6970 (6.1%)   | 0.89 (0.71–1.13) | 0.339 | 0.89 (0.70–1.12) | 0.315 | 0.91 (0.72–1.15) | 0.447 |  |
| CCI score = 0 (n = 11,036)              |                   |                   |                  |       |                  |       |                  |       |  |
| CP < 3                                  | 1859/1991 (93.4%) | 8481/9045 (93.8%) | 1                |       | 1                |       | 1                |       |  |
| CP ≥ 3                                  | 132/1991 (6.6%)   | 564/9045 (6.2%)   | 1.07 (0.88–1.30) | 0.512 | 1.08 (0.88–1.31) | 0.462 | 1.08 (0.88–1.31) | 0.468 |  |
| CCI score = 1 (n = 3038)                |                   |                   |                  |       |                  |       |                  |       |  |
| CP < 3                                  | 699/740 (94.5%)   | 2162/2298 (94.1%) | 1                |       | 1                |       | 1                |       |  |
| CP ≥ 3                                  | 41/740 (5.5%)     | 136/2298 (5.9%)   | 0.93 (0.65–1.34) | 0.703 | 0.94 (0.66–1.35) | 0.747 | 0.95 (0.66–1.36) | 0.766 |  |
| CCI score ≥ 2 (n = 3766)                |                   |                   |                  |       |                  |       |                  |       |  |
| CP < 3                                  | 790/837 (94.4%)   | 2758/2929 (94.2%) | 1                |       | 1                |       | 1                |       |  |
| CP ≥ 3                                  | 47/837 (5.6%)     | 171/2929 (5.8%)   | 0.96 (0.69–1.34) | 0.810 | 0.96 (0.68–1.34) | 0.791 | 0.96 (0.69–1.34) | 0.810 |  |

Abbreviations: CP, chronic periodontitis; RA, rheumatoid arthritis; SBP, systolic blood pressure; DBP, diastolic blood pressure; CCI, Charlson Comorbidity Index.

\* Conditional or unconditional logistic regression analysis, Significance at  $p < 0.05$

† Stratified model for age, sex, income, and region of residence.

‡ Model 1 was adjusted for smoking, alcohol consumption, obesity and CCI scores.

§ Model 2 was adjusted for model 1 plus total cholesterol, systolic blood pressure, diastolic blood pressure, and fasting blood glucose.

**Supplementary Table S4.** Subgroup analyses of crude and adjusted odds ratios of chronic periodontitis (CP) for rheumatoid arthritis (RA) when participants are diagnosed with CP  $\geq 1$  within 2 years before index date.

| N of RA<br>(exposure/total, %)                   |                    | N of Control<br>(exposure/total, %) | Odd ratios for RA (95% confidence interval) |          |                  |          |                  |          |
|--------------------------------------------------|--------------------|-------------------------------------|---------------------------------------------|----------|------------------|----------|------------------|----------|
|                                                  |                    |                                     | Crude†                                      | <i>p</i> | Model 1†‡        | <i>p</i> | Model 2†§        | <i>p</i> |
| Age < 65 years old (n = 8780)                    |                    |                                     |                                             |          |                  |          |                  |          |
| No CP                                            | 1,229/1756 (70.0%) | 4961/7024 (70.6%)                   | 1                                           |          | 1                |          | 1                |          |
| CP ≥ 1                                           | 527/1756 (30.0%)   | 2063/7024 (29.4%)                   | 1.03 (0.92–1.16)                            | 0.597    | 1.03 (0.92–1.16) | 0.596    | 1.04 (0.93–1.17) | 0.509    |
| Age ≥ 65 years old (n = 9060)                    |                    |                                     |                                             |          |                  |          |                  |          |
| No CP                                            | 1087/1812 (60.0%)  | 4568/7248 (63.0%)                   | 1                                           |          | 1                |          | 1                |          |
| CP ≥ 1                                           | 725/1812 (40.0%)   | 2680/7248 (37.0%)                   | 1.14 (1.02–1.26)                            | 0.017*   | 1.14 (1.02–1.26) | 0.018*   | 1.17 (1.05–1.30) | 0.005*   |
| Men (n = 5275)                                   |                    |                                     |                                             |          |                  |          |                  |          |
| No CP                                            | 617/1055 (58.5%)   | 2555/4220 (60.6%)                   | 1                                           |          | 1                |          | 1                |          |
| CP ≥ 1                                           | 438/1055 (41.5%)   | 1665/4220 (39.5%)                   | 1.09 (0.95–1.25)                            | 0.221    | 1.09 (0.95–1.25) | 0.217    | 1.11 (0.97–1.28) | 0.127    |
| Women (n = 12,565)                               |                    |                                     |                                             |          |                  |          |                  |          |
| No CP                                            | 1699/2513 (67.6%)  | 6974/10,052 (69.4%)                 | 1                                           |          | 1                |          | 1                |          |
| CP ≥ 1                                           | 814/2513 (32.4%)   | 3078/10,052 (30.6%)                 | 1.09 (0.99–1.19)                            | 0.086    | 1.09 (0.99–1.20) | 0.081    | 1.11 (1.01–1.22) | 0.037*   |
| Low income (n = 8630)                            |                    |                                     |                                             |          |                  |          |                  |          |
| No CP                                            | 1159/1726 (67.2%)  | 4756/6904 (68.9%)                   | 1                                           |          | 1                |          | 1                |          |
| CP ≥ 1                                           | 567/1726 (32.9%)   | 2148/6904 (31.1%)                   | 1.08 (0.97–1.21)                            | 0.164    | 1.09 (0.97–1.22) | 0.144    | 1.10 (0.98–1.24) | 0.092    |
| High income (n = 9210)                           |                    |                                     |                                             |          |                  |          |                  |          |
| No CP                                            | 1157/1842 (62.8%)  | 4773/7368 (64.8%)                   | 1                                           |          | 1                |          | 1                |          |
| CP ≥ 1                                           | 685/1842 (37.2%)   | 2595/7368 (35.2%)                   | 1.09 (0.98–1.21)                            | 0.115    | 1.09 (0.98–1.21) | 0.120    | 1.11 (1.00–1.24) | 0.053    |
| Urban residents (n = 7705)                       |                    |                                     |                                             |          |                  |          |                  |          |
| No CP                                            | 971/1541 (63.0%)   | 3971/6164 (64.4%)                   | 1                                           |          | 1                |          | 1                |          |
| CP ≥ 1                                           | 570/1541 (37.0%)   | 2193/6164 (35.6%)                   | 1.06 (0.95–1.19)                            | 0.302    | 1.06 (0.94–1.19) | 0.329    | 1.07 (0.95–1.21) | 0.243    |
| Rural residents (n = 10,135)                     |                    |                                     |                                             |          |                  |          |                  |          |
| No CP                                            | 1345/2027 (66.4%)  | 5558/8108 (68.6%)                   | 1                                           |          | 1                |          | 1                |          |
| CP ≥ 1                                           | 682/2027 (33.7%)   | 2550/8108 (31.5%)                   | 1.11 (1.00–1.23)                            | 0.058    | 1.11 (1.00–1.23) | 0.048*   | 1.14 (1.02–1.26) | 0.018*   |
| Underweight (n = 388)                            |                    |                                     |                                             |          |                  |          |                  |          |
| No CP                                            | 48/69 (69.6%)      | 224/319 (70.2%)                     | 1                                           |          | 1                |          | 1                |          |
| CP ≥ 1                                           | 21/69 (30.4%)      | 95/319 (29.8%)                      | 1.03 (0.59–1.82)                            | 0.914    | 0.97 (0.54–1.75) | 0.931    | 1.03 (0.59–1.82) | 0.995    |
| Normal weight (n = 6468)                         |                    |                                     |                                             |          |                  |          |                  |          |
| No CP                                            | 872/1334 (65.4%)   | 3477/5134 (67.7%)                   | 1                                           |          | 1                |          | 1                |          |
| CP ≥ 1                                           | 462/1334 (34.6%)   | 1657/5134 (32.3%)                   | 1.11 (0.98–1.26)                            | 0.102    | 1.11 (0.98–1.26) | 0.111    | 1.14 (1.10–1.30) | 0.049*   |
| Overweight (n = 4807)                            |                    |                                     |                                             |          |                  |          |                  |          |
| No CP                                            | 602/945 (63.7%)    | 2557/3862 (66.2%)                   | 1                                           |          | 1                |          | 1                |          |
| CP ≥ 1                                           | 343/945 (36.3%)    | 1305/3862 (33.8%)                   | 1.12 (0.96–1.30)                            | 0.146    | 1.11 (0.96–1.29) | 0.164    | 1.13 (0.97–1.31) | 0.116    |
| Obese (n = 6177)                                 |                    |                                     |                                             |          |                  |          |                  |          |
| No CP                                            | 794/1220 (65.1%)   | 3271/4957 (66.0%)                   | 1                                           |          | 1                |          | 1                |          |
| CP ≥ 1                                           | 426/1220 (34.9%)   | 1686/4957 (34.0%)                   | 1.04 (0.91–1.19)                            | 0.549    | 1.05 (0.92–1.20) | 0.449    | 1.06 (0.93–1.22) | 0.374    |
| Non-smoker (n = 14,404)                          |                    |                                     |                                             |          |                  |          |                  |          |
| No CP                                            | 1885/2853 (66.1%)  | 7847/11,551 (67.9%)                 | 1                                           |          | 1                |          | 1                |          |
| CP ≥ 1                                           | 968/2853 (33.9%)   | 3704/11,551 (32.1%)                 | 1.09 (1.00–1.19)                            | 0.057    | 1.09 (1.00–1.19) | 0.048*   | 1.11 (1.01–1.21) | 0.023*   |
| Past smoker and current smoker (n = 3436)        |                    |                                     |                                             |          |                  |          |                  |          |
| No CP                                            | 431/715 (60.3%)    | 1682/2721 (61.8%)                   | 1                                           |          | 1                |          | 1                |          |
| CP ≥ 1                                           | 284/715 (39.7%)    | 1039/2721 (38.2%)                   | 1.07 (0.90–1.26)                            | 0.453    | 1.08 (0.91–1.28) | 0.400    | 1.11 (0.93–1.31) | 0.254    |
| Alcohol consumption < 1 time a week (n = 13,182) |                    |                                     |                                             |          |                  |          |                  |          |
| No CP                                            | 1825/2690 (67.8%)  | 7314/10,492 (69.7%)                 | 1                                           |          | 1                |          | 1                |          |
| CP ≥ 1                                           | 865/2690 (32.2%)   | 3178/10,492 (30.3%)                 | 1.09 (1.00–1.19)                            | 0.061    | 1.09 (0.99–1.19) | 0.066    | 1.10 (1.01–1.21) | 0.037*   |
| Alcohol consumption ≥ 1 time a week (n = 4658)   |                    |                                     |                                             |          |                  |          |                  |          |
| No CP                                            | 491/878 (55.9%)    | 2215/3780 (58.6%)                   | 1                                           |          | 1                |          | 1                |          |
| CP ≥ 1                                           | 387/878 (44.1%)    | 1565/3780 (41.4%)                   | 1.12 (0.96–1.29)                            | 0.148    | 1.11 (0.96–1.29) | 0.159    | 1.12 (0.96–1.30) | 0.148    |
| SBP < 140 mmHg and DBP < 90 mmHg (n = 13,526)    |                    |                                     |                                             |          |                  |          |                  |          |
| No CP                                            | 1778/2783 (63.9%)  | 7101/10,743 (66.1%)                 | 1                                           |          | 1                |          | 1                |          |
| CP ≥ 1                                           | 1005/2783 (36.1%)  | 3642/10,743 (33.9%)                 | 1.10 (1.01–1.20)                            | 0.029*   | 1.11 (1.01–1.21) | 0.025*   | 1.13 (1.04–1.24) | 0.007*   |
| SBP ≥ 140 mmHg or DBP ≥ 90 mmHg (n = 4314)       |                    |                                     |                                             |          |                  |          |                  |          |
| No CP                                            | 538/785 (68.5%)    | 2428/3529 (68.8%)                   | 1                                           |          | 1                |          | 1                |          |
| CP ≥ 1                                           | 247/785 (31.5%)    | 1101/3529 (31.2%)                   | 1.01 (0.86–1.20)                            | 0.884    | 1.02 (0.86–1.20) | 0.853    | 1.02 (0.86–1.21) | 0.782    |
| Fasting blood glucose < 100 mg/dL (n = 11,535)   |                    |                                     |                                             |          |                  |          |                  |          |
| No CP                                            | 1561/2381 (65.6%)  | 6272/9154 (68.5%)                   | 1                                           |          | 1                |          | 1                |          |
| CP ≥ 1                                           | 820/2381 (34.4%)   | 2882/9154 (31.5%)                   | 1.14 (1.04–1.26)                            | 0.006*   | 1.14 (1.03–1.25) | 0.008*   | 1.15 (1.05–1.27) | 0.004*   |
| Fasting blood glucose ≥ 100 mg/dL (n = 6305)     |                    |                                     |                                             |          |                  |          |                  |          |

|                                         |                   |                   |                  |        |                  |        |                  |        |
|-----------------------------------------|-------------------|-------------------|------------------|--------|------------------|--------|------------------|--------|
| No CP                                   | 755/1187 (63.6%)  | 3257/5118 (63.6%) | 1                |        | 1                |        | 1                |        |
| CP ≥ 1                                  | 432/1187 (36.4%)  | 1861/5118 (36.4%) | 1.00 (0.88–1.14) | 0.983  | 1.00 (0.88–1.14) | 0.975  | 1.03 (0.90–1.18) | 0.677  |
| Total cholesterol < 200mg/dL (n = 9209) |                   |                   |                  |        |                  |        |                  |        |
| No CP                                   | 1245/1907 (65.3%) | 4853/7302 (66.5%) | 1                |        | 1                |        | 1                |        |
| CP ≥ 1                                  | 662/1907 (34.7%)  | 2449/7302 (33.5%) | 1.05 (0.95–1.17) | 0.334  | 1.06 (0.95–1.18) | 0.311  | 1.07 (0.96–1.19) | 0.217  |
| Total cholesterol ≥ 200mg/dL (n = 8631) |                   |                   |                  |        |                  |        |                  |        |
| No CP                                   | 1071/1661 (64.5%) | 4676/6970 (67.1%) | 1                |        | 1                |        | 1                |        |
| CP ≥ 1                                  | 590/1661 (35.5%)  | 2294/6970 (32.9%) | 1.12 (1.00–1.26) | 0.043* | 1.13 (1.01–1.26) | 0.040* | 1.15 (1.03–1.29) | 0.015* |
| CCI score = 0 (n = 11,036)              |                   |                   |                  |        |                  |        |                  |        |
| No CP                                   | 1266/1991 (63.6%) | 6023/9045 (66.6%) | 1                |        | 1                |        | 1                |        |
| CP ≥ 1                                  | 725/1991 (36.4%)  | 3022/9045 (33.4%) | 1.14 (1.03–1.26) | 0.010* | 1.15 (1.04–1.28) | 0.007* | 1.16 (1.05–1.29) | 0.005* |
| CCI score = 1 (n = 3038)                |                   |                   |                  |        |                  |        |                  |        |
| No CP                                   | 487/740 (65.8%)   | 1513/2298 (65.8%) | 1                |        | 1                |        | 1                |        |
| CP ≥ 1                                  | 253/740 (34.2%)   | 785/2298 (34.2%)  | 1.00 (0.84–1.19) | 0.988  | 1.02 (0.85–1.21) | 0.863  | 1.02 (0.86–1.22) | 0.806  |
| CCI score ≥ 2 (n = 3766)                |                   |                   |                  |        |                  |        |                  |        |
| No CP                                   | 563/837 (67.3%)   | 1993/2929 (68.0%) | 1                |        | 1                |        | 1                |        |
| CP ≥ 1                                  | 274/837 (32.7%)   | 936/2929 (32.0%)  | 1.04 (0.88–1.22) | 0.669  | 1.04 (0.89–1.23) | 0.604  | 1.06 (0.90–1.25) | 0.495  |

Abbreviations: CP, chronic periodontitis; RA, rheumatoid arthritis; SBP, systolic blood pressure; DBP, diastolic blood pressure; CCI, Charlson Comorbidity Index.

\* Conditional or unconditional logistic regression analysis, Significance at  $p < 0.05$

† Stratified model for age, sex, income, and region of residence.

‡ Model 1 was adjusted for smoking, alcohol consumption, obesity and CCI scores.

§ Model 2 was adjusted for model 1 plus total cholesterol, systolic blood pressure, diastolic blood pressure, and fasting blood glucose.



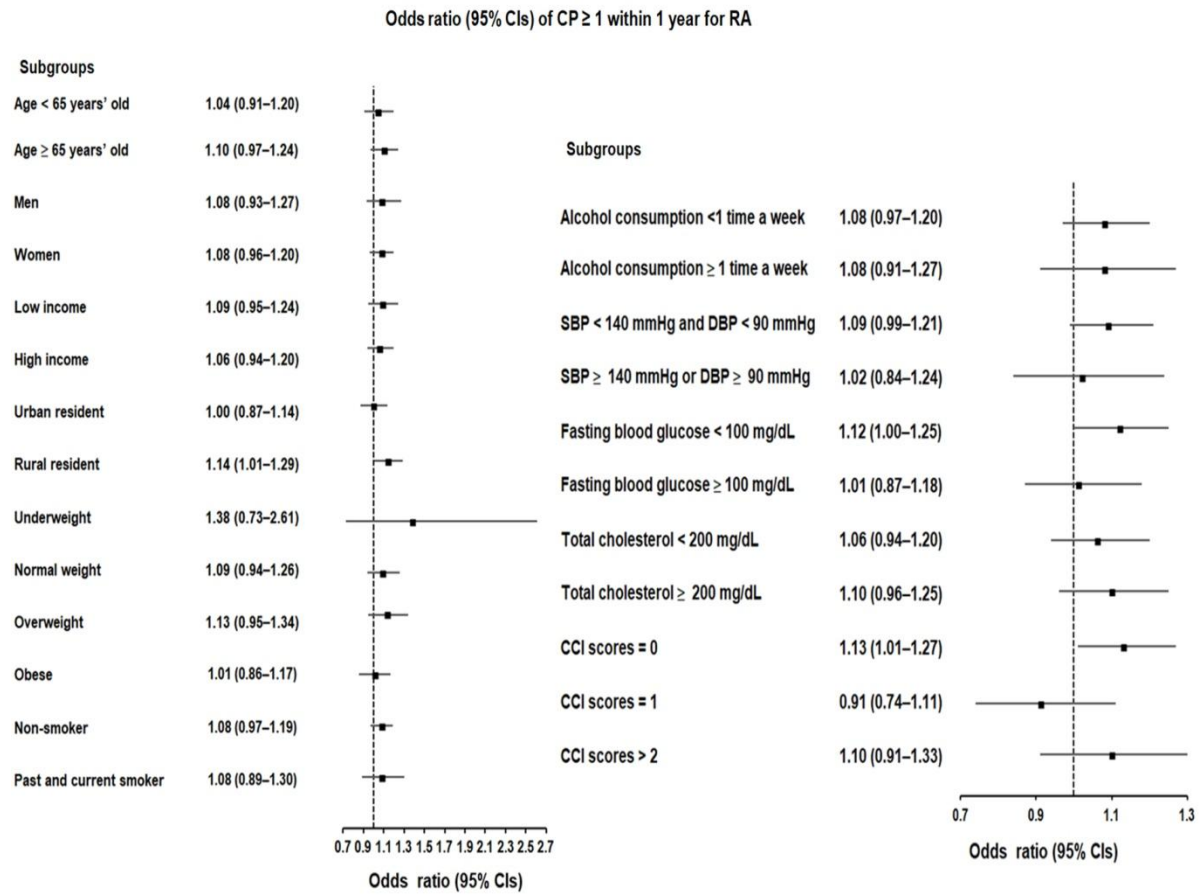

**Supplementary Figure S1.** Forest plots illustrating the adjusted odds ratio and corresponding 95% confidence intervals (CIs) for demographic, lifestyle, and comorbid factors related to chronic periodontitis (CP) concerning the development of rheumatoid arthritis (RA) when individuals are diagnosed with CP  $\geq$  1 within 1 year preceding the index date.

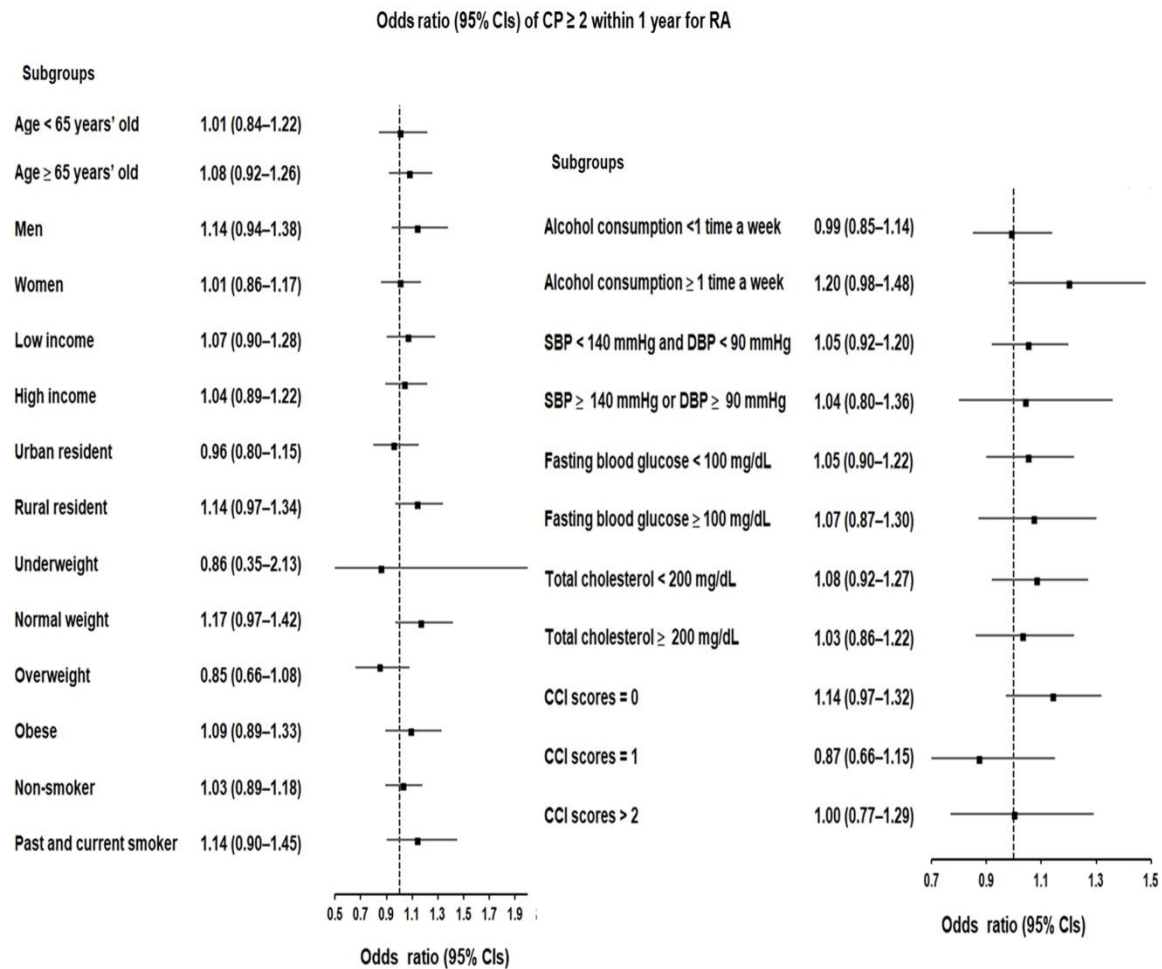

**Supplementary Figure S2.** Forest plots illustrating the adjusted odds ratio and corresponding 95% confidence intervals (CIs) for demographic, lifestyle, and comorbid factors related to chronic periodontitis (CP) concerning the development of rheumatoid arthritis (RA) when individuals are diagnosed with CP  $\geq 2$  within 1 year preceding the index date.

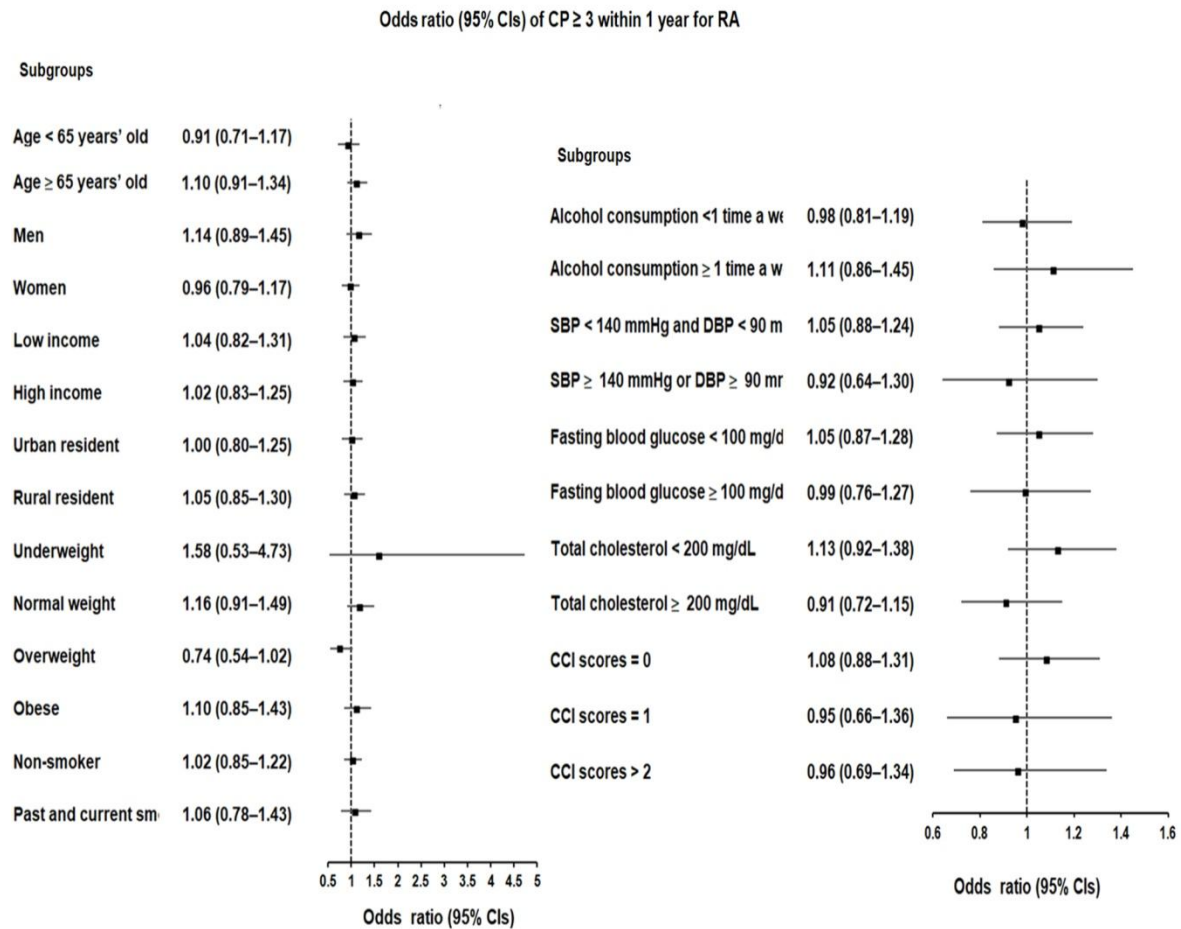

**Supplementary Figure S3.** Forest plots illustrating the adjusted odds ratio and corresponding 95% confidence intervals (CIs) for demographic, lifestyle, and comorbid factors related to chronic periodontitis (CP) concerning the development of rheumatoid arthritis (RA) when individuals are diagnosed with CP  $\geq$  3 within 1 year preceding the index date.
